# Supplementary material
Source: publisher site journal article supplement (https://www.spandidos-publications.com/8255/downloadSupplementary)
Supplement: Supplementary file 1 [file downloadSupplementary]

Table SI. Performance of **log-log** linear models (M1-M6) predicting **24hUP** from **UPCR**.

| ID             | Model                                                                              | Adj.<br>R <sup>2</sup> | AIC     | BIC     | RMSE  | MAE   | CV-<br>RMSE | CV-<br>MAE |
|----------------|------------------------------------------------------------------------------------|------------------------|---------|---------|-------|-------|-------------|------------|
| M <sub>1</sub> | Log <sub>10</sub> (24hUP) ~ Log <sub>10</sub> (mUPCR)                              | 0.67                   | -247.93 | -238.51 | 35.15 | 27.01 | 35.76       | 27.45      |
| M <sub>2</sub> | Log <sub>10</sub> (24hUP) ~ Log <sub>10</sub> (eUPCR <sub>0</sub> )                | 0.84                   | -367.64 | -358.21 | 21.66 | 16.54 | 21.84       | 16.67      |
| M <sub>3</sub> | Log <sub>10</sub> (24hUP) ~ Log <sub>10</sub> (eUPCR <sub>1</sub> )                | 0.69                   | -254.71 | -245.29 | 33.26 | 25.37 | 33.70       | 25.71      |
| M <sub>4</sub> | Log <sub>10</sub> (24hUP) ~ Log <sub>10</sub> (eUPCR <sub>2</sub> )                | 0.63                   | -227.79 | -218.37 | 36.08 | 27.76 | 36.53       | 28.00      |
| M <sub>5</sub> | Log <sub>10</sub> (24hUP) ~ Log <sub>10</sub> (eUPCR <sub>3</sub> )                | 0.78                   | -310.16 | -300.73 | 28.87 | 20.94 | 29.15       | 21.22      |
| M <sub>6</sub> | Log <sub>10</sub> (24hUP) ~ Log <sub>10</sub> (eUPCR <sub>3</sub> )<br>+ age + sex | 0.80                   | -328.60 | -312.90 | 27.41 | 19.73 | 28.14       | 20.25      |

eUPCR<sub>0</sub> = mUPCR x m24hUCr; eUPCR<sub>1</sub>, eUPCR<sub>2</sub>, eUPCR<sub>3</sub> = mUPCR x e24hUCr estimated using the Hellerstein, Ghazali-Barratt and Cockcroft-Gault equations, respectively. Reported RMSE/MAE and CV-RMSE/CV-MAE are on the original scale (mg/m<sup>2</sup>/h) after Duan's smearing back-transformation. Adj. R<sup>2</sup>, adjusted R<sup>2</sup>; AIC, Akaike information criterion; BIC, Bayesian/Schwarz information criterion; RMSE, root mean square error; MAE, mean absolute error; CV-RMSE/CV-MAE, 10-fold cross-validated RMSE/MAE; UPCR, urinary protein-creatinine ratio; 24hUP, 24-h urine protein; 24hUCr, 24-h urine creatinine; m, measured; e, estimated.

Table SII. Diagnostics for model M<sub>6</sub> (Log<sub>10</sub>-scale).

| Domain                                                                                                                                                                                                                                                                                                                                                                                                                                                                                                                                                                                                                                                | Test                        | Statistic         | P-value | Conclusion               |
|-------------------------------------------------------------------------------------------------------------------------------------------------------------------------------------------------------------------------------------------------------------------------------------------------------------------------------------------------------------------------------------------------------------------------------------------------------------------------------------------------------------------------------------------------------------------------------------------------------------------------------------------------------|-----------------------------|-------------------|---------|--------------------------|
| Residual distribution                                                                                                                                                                                                                                                                                                                                                                                                                                                                                                                                                                                                                                 | Shapiro-Wilk                | -                 | 0.022   | Mild tail deviation      |
|                                                                                                                                                                                                                                                                                                                                                                                                                                                                                                                                                                                                                                                       | Skewness/Kurtosis           | -                 | 0.649   | Fail to reject normality |
| Heteroskedasticity                                                                                                                                                                                                                                                                                                                                                                                                                                                                                                                                                                                                                                    | Breusch-Pagan/Cook-Weisberg | $\chi^2(3)=7.64$  | 0.054   | Borderline               |
|                                                                                                                                                                                                                                                                                                                                                                                                                                                                                                                                                                                                                                                       | White's test                | $\chi^2(8)=14.40$ | 0.072   | No evidence              |
|                                                                                                                                                                                                                                                                                                                                                                                                                                                                                                                                                                                                                                                       | IM-test (overall)           | -                 | 0.173   | No evidence              |
| Functional form                                                                                                                                                                                                                                                                                                                                                                                                                                                                                                                                                                                                                                       | RESET                       | F(3,164)=1.45     | 0.229   | No misspecification      |
|                                                                                                                                                                                                                                                                                                                                                                                                                                                                                                                                                                                                                                                       | Link test (hatsq)           | -                 | 0.200   | No omitted nonlinearity  |
| Multicollinearity                                                                                                                                                                                                                                                                                                                                                                                                                                                                                                                                                                                                                                     | VIF (min-max, mean)         | 1.02-1.05; 1.04   |         | None                     |
| <p>Inference reported with heteroskedasticity-consistent SEs (HC3) due to borderline heteroskedasticity. Model M<sub>6</sub>: <math>\text{Log}_{10}[24\text{hUP (mg/m}^2\text{/h)}] = 0.291 + 0.880 \times \text{Log}_{10}(\text{adjusted UPCR}) - 0.006 \times \text{age (years)} + 0.057 \times \text{xex (0 = boy, 1 = girl)}</math>. Adjusted UPCR = <math>\text{mUPCR} \times \text{e}^{24\text{hUCr}_{\text{Cockcroft-Gault}}}</math>; n = 171; adjusted R<sup>2</sup> = 0.80s UPCR, urinary protein-creatinine ratio; 24hUP, 24-h urine protein; 24hUCr, 24-h urine creatinine; m, measured; e, estimated; VIF, variance inflation factor.</p> |                             |                   |         |                          |
